# Supplementary material for: Motility defects in Campylobacter jejuni defined gene deletion mutants caused by second-site mutations
Source: PubMed Central journal article supplement (PMC4811654; doi:10.1099/mic.0.000184), 2015-12
Supplement: 000184.pdf [file 000184.pdf]

**Table S1.** Sequence of oligonucleotides used in this study

| Primer Name              | Target <sup>a</sup>                     | Sequence (5' - 3') <sup>b</sup>                    |
|--------------------------|-----------------------------------------|----------------------------------------------------|
| L_WITS_1_cam_FW1         | Cm <sup>r</sup> cassette                | AAGCTTGGCGTGGGAGTG                                 |
| R_WITS_cam_RV1           | Cm <sup>r</sup> cassette                | GAATTCCGCCCTTTAGTTCC                               |
| CC069                    | Cm <sup>r</sup> cassette control primer | ATATGTGCAGGGCGTATTGC                               |
| <i>flaB</i> _L1-FW1      | <i>flaB</i> (CJM1_1294) left flank      | AGCAGATATTAACCGCTTGATGG                            |
| <i>flaB</i> _L2-RV1      | <i>flaB</i> (CJM1_1294) left flank      | CACTCCCACGCCAAGCTTACCGCAT<br>TGATAGCTGAAACC        |
| <i>flaB</i> _R1-FW1      | <i>flaB</i> (CJM1_1294) right flank     | GGAACTAAAGGGCGGAATTCAAATAT<br>AACATTCTTGACAATCAGGC |
| <i>flaB</i> _R2-RV1      | <i>flaB</i> (CJM1_1294) right flank     | TTCTTGCATGAAATTTTAGGACCT                           |
| <i>flaB</i> _A-RV1       | <i>flaB</i> (CJM1_1294) control primer  | ACAAGCTTGCCGTTTTTCATC                              |
| <i>pflA</i> _L1-FW1      | <i>pflA</i> (CJM1_1501) left flank      | TGAGAGTTTAAATGGGCTTTTGG                            |
| <i>pflA</i> _L2-RV1      | <i>pflA</i> (CJM1_1501) left flank      | CACTCCCACGCCAAGCTTGCTTGATT<br>ATTTTCGCGACCC        |
| <i>pflA</i> _R1-FW1      | <i>pflA</i> (CJM1_1501) right flank     | GGAACTAAAGGGCGGAATTCAATCA<br>AAAGTGCTTCAAATTGGC    |
| <i>pflA</i> _R2-RV1      | <i>pflA</i> (CJM1_1501) right flank     | AGAGTAGGTTCTGATATGAATGCT                           |
| <i>pflA</i> _A-RV1       | <i>pflA</i> (CJM1_1501) control primer  | AGCTCCAACATAAGGCAAACCTC                            |
| <i>flaD</i> _L1-FW1      | <i>flaD</i> (CJM1_0851) left flank      | AATCAAGATTTATCCGATCCAAATGT                         |
| <i>flaD</i> _L2-RV1      | <i>flaD</i> (CJM1_0851) left flank      | CACTCCCACGCCAAGCTTAAGCACTT<br>TGACCGCCATA          |
| <i>flaD</i> _R1-FW1      | <i>flaD</i> (CJM1_0851) right flank     | GGAACTAAAGGGCGGAATTCAGCTA<br>GTACAACAATTTCCCAAC    |
| <i>flaD</i> _R2-RV1      | <i>flaD</i> (CJM1_0851) right flank     | ATTCCACTCCCTGTATGCC                                |
| <i>flaD</i> _A-RV1       | <i>flaD</i> (CJM1_0851) control primer  | GCTTTCAGTTCAGCTCCAG                                |
| <i>flaB</i> *_L1-FW1     | <i>flaB</i> (CJM1_1295) left flank      | CAGAAACTGCTATAACAAATCTAGA                          |
| <i>flaB</i> *_L2-RV1     | <i>flaB</i> (CJM1_1295) left flank      | CTCACTCCCACGCCAAGCTTCCGAT<br>GTTGGTGTTTATCCT       |
| <i>flaB</i> *_A-RV1      | <i>flaB</i> (CJM1_1295) control primer  | GTTTGGTTTGAAGTTGCGCC                               |
| <i>flaA</i> _L1-FW2      | <i>flaA</i> (CJM1_1296) left flank      | TTTGCTTAGAACATGCTATAAGGTT                          |
| <i>flaA</i> _L2-RV2      | <i>flaA</i> (CJM1_1296) left flank      | CTCACTCCCACGCCAAGCTTTGCTTG<br>AGATCTTAAGCTATCTGCT  |
| <i>flaA</i> _R1-RV1      | <i>flaA</i> (CJM1_1296) right flank     | GGAACTAAAGGGCGGAATTCCTCAA<br>GCAAATTCTAGTCAGCAA    |
| <i>flaA</i> _R2-RV1      | <i>flaA</i> (CJM1_1296) right flank     | TTGCTGCTTGTGAACGCAAA                               |
| <i>flaA</i> _A-RV1       | <i>flaA</i> (CJM1_1296) control primer  | TCCTGAACCTTGTGCACTCA                               |
| <i>fliW</i> -L1-FW1      | <i>fliW</i> (CJM1_1052) left flank      | CAGCATTGCGTGAATTTCCAA                              |
| <i>fliW</i> -L2-RV1      | <i>fliW</i> (CJM1_1052) left flank      | CTCACTCCCACGCCAAGCTTGCATTT<br>AACAGCTAGGGTCATG     |
| <i>fliW</i> -R1-FW1      | <i>fliW</i> (CJM1_1052) right flank     | GGAACTAAAGGGCGGAATTCAGTAG<br>ATACAGTTAATTATCCCGACT |
| <i>fliW</i> _R2-RV1      | <i>fliW</i> (CJM1_1052) right flank     | ATGGTGTGGTTGAAGCCTTG                               |
| <i>fliW</i> _A-RV1       | <i>fliW</i> (CJM1_1052) control primer  | TCAAGATTAATGACTACTGGAGCT                           |
| <i>fliW</i> _GC.XhoI_FW1 | <i>fliW</i> genetic complementation     | CAGCTCGAGACTTCACCTTGATTTAT<br>ATTCTC               |

---

|                                    |                                     |                                                |
|------------------------------------|-------------------------------------|------------------------------------------------|
| <i>fliW</i> _GC. <i>Bam</i> HI_RV1 | <i>fliW</i> genetic complementation | <u>CTGCCTAGGG</u> GATCCATTTGCAAGTAT<br>ATAGAGC |
| pSV009_GC <i>amplif</i> _FW1       | genetic complementation region      | TAATAGAAATTTCCCAAGTCCCA                        |
| pSV009_GC <i>amplif</i> _RV1       | genetic complementation region      | CTATTGCCATAGTAGCTCTTAGTGG                      |
| pSV009_seq_FW1                     | sequencing complemented gene        | GGAGACATTCCTCCGTATCT                           |
| pSV009_seq_RV1                     | sequencing complemented gene        | AGCGAGACAAAAACACTGAGC                          |

---

<sup>a</sup> Abbreviations for antibiotics: Cm<sup>r</sup>, chloramphenicol resistance. <sup>b</sup> restriction sites are underlined.

**Table S2** Overview of variants identified in CJM1cam compared to the M1 reference genome

| Position <sup>a</sup> | Gene or intergenic   | Gene             | Description (C. jejuni M1 annotation)                                             | Reference | Variant | Variant type | Feature Type | Variant effect            | Predicted effect (protein level) <sup>b</sup>                                                                        | Method of identification |
|-----------------------|----------------------|------------------|-----------------------------------------------------------------------------------|-----------|---------|--------------|--------------|---------------------------|----------------------------------------------------------------------------------------------------------------------|--------------------------|
| 60704                 | CJM1_0043            | -                | putative drug resistance transporter                                              | A         | C       | SNP          | transcript   | stop lost, splice region  | Ter351Gly; termination codon at position 351 changed to a glycine with the extension not containing a new stop codon | Illumina sequencing      |
| 130527                | CJM1_0121            | -                | conserved hypothetical protein                                                    | T         | G       | SNP          | coding       | mis-sense                 | Cys418Gly                                                                                                            | Illumina sequencing      |
| 243119                | CJM1_0246            | <i>zupT</i>      | ZIP Zinc transporter family protein                                               | -         | A       | Insertion    | coding       | frameshift                | Asn144fs                                                                                                             | Illumina sequencing      |
| 254704                | CJM1_0259            | <i>clpX</i>      | ATP-dependent Clp protease, ATP-binding subunit ClpX                              | -         | A       | Insertion    | coding       | frameshift                | Ile406fs                                                                                                             | Illumina sequencing      |
| 328734                | CJM1_0339            | <i>lspA</i>      | signal peptidase II                                                               | -         | T       | Insertion    | coding       | frameshift                | Gly117fs                                                                                                             | Illumina sequencing      |
| 345149                | CJM1_0355            | -                | ATPase associated with various cellular activities family protein                 | -         | A       | Insertion    | coding       | frameshift                | Val436fs                                                                                                             | Illumina sequencing      |
| 538730                | CJM1_0561            | -                | DNA polymerase III, delta subunit                                                 | T         | -       | Deletion     | coding       | frameshift                | Leu172fs                                                                                                             | Illumina sequencing      |
| 566518                | CJM1_0588, CJM1_0589 | <i>algI/-</i>    | Alginate O-acetyltransferase AlgI/hypothetical protein                            | A         | -       | Deletion     | coding       | frameshift, frameshift    | Leu5fs/Ala206fs                                                                                                      | Illumina sequencing      |
| 620355                | CJM1_0644            | -                | potassium-transporting ATPase A subunit                                           | -         | T       | Insertion    | coding       | frameshift                | Tyr249fs                                                                                                             | Illumina sequencing      |
| 624999                | CJM1_0648            | <i>kdpD</i>      | universal stress family protein                                                   | -         | A       | Insertion    | coding       | frameshift                | Ser345fs                                                                                                             | Illumina sequencing      |
| 635642                | CJM1_0659            | -                | conserved hypothetical protein                                                    | C         | -       | Deletion     | coding       | frameshift                | Gly134fs                                                                                                             | Illumina sequencing      |
| 648786                | CJM1_0674            | -                | conserved hypothetical protein                                                    | T         | -       | Deletion     | coding       | frameshift                | Asn194fs                                                                                                             | Illumina sequencing      |
| 684129                | CJM1_0713            | -                | putative membrane protein                                                         | C         | G       | SNP          | coding       | mis-sense                 | Pro24Ala                                                                                                             | Illumina sequencing      |
| 752411                | CJM1_0777            | -                | mviN-like family protein                                                          | -         | A       | Insertion    | coding       | frameshift                | Glu77fs                                                                                                              | Illumina sequencing      |
| 790633                | CJM1_0815            | -                | putative soluble lytic murein transglycosylase                                    | A         | G       | SNP          | coding       | mis-sense                 | Ile291Thr                                                                                                            | Illumina sequencing      |
| 813743                | CJM1_0839            | <i>astA</i>      | arylsulfotransferase family protein                                               | A         | -       | Deletion     | coding       | frameshift                | Arg427fs                                                                                                             | Illumina sequencing      |
| 813749                | CJM1_0839            | <i>astA</i>      | arylsulfotransferase family protein                                               | T         | G       | SNP          | coding       | mis-sense                 | Leu428Val                                                                                                            | Illumina sequencing      |
| 817253                | CJM1_0845, CJM1_0846 | -, -             | hypothetical protein, hypothetical protein                                        | A         | C       | SNP          | intergenic   | -                         | -                                                                                                                    | Illumina sequencing      |
| 861927                | CJM1_0891            | <i>apt</i>       | adenine phosphoribosyltransferase                                                 | C         | T       | SNP          | coding       | mis-sense                 | Leu46Phe                                                                                                             | Illumina sequencing      |
| 878548                | CJM1_0907            | -                | putative cju26                                                                    | A         | G       | SNP          | coding       | mis-sense                 | Leu5Pro                                                                                                              | Illumina sequencing      |
| 921927                | CJM1_0954            | -                | M42 glutamyl aminopeptidase family protein                                        | -         | A       | Insertion    | coding       | frameshift                | Arg170fs                                                                                                             | Illumina sequencing      |
| 939896                | CJM1_0974            | <i>rpoD</i>      | RNA polymerase sigma factor RpoD                                                  | A         | T       | SNP          | coding       | mis-sense                 | Asp106Val                                                                                                            | Illumina sequencing      |
| 961924                | CJM1_0995            | -                | putative porin domain protein                                                     | -         | T       | Insertion    | coding       | frameshift                | Asn44fs                                                                                                              | Illumina sequencing      |
| 965941                | CJM1_1000, CJM1_1001 | -, <i>gyrA</i>   | Putative lipoprotein, DNA gyrase subunit A                                        | -         | T       | Insertion    | coding       | -                         | -                                                                                                                    | Illumina sequencing      |
| 972139                | CJM1_1005            | <i>cmeD</i>      | outer membrane efflux family protein                                              | A         | G       | SNP          | coding       | synonymous                | Leu93Leu                                                                                                             | Illumina sequencing      |
| 1002619               | CJM1_1032, CJM1_1033 | -, <i>murC</i>   | integral membrane protein, UDP-N-acetylmuramate-L-alanine ligase                  | -         | A       | Insertion    | intergenic   | -                         | -                                                                                                                    | Illumina sequencing      |
| 1103635               | CJM1_1139            | -                | rho termination factor, N-terminal domain protein                                 | -         | A       | Insertion    | coding       | frameshift                | Ala63fs                                                                                                              | Illumina sequencing      |
| 1130876               | CJM1_1170            | <i>mnmG</i>      | putative tRNA uridine 5-carboxymethylaminomethyl modification enzyme MnmG         | A         | G       | SNP          | coding       | mis-sense                 | Val438Ala                                                                                                            | Illumina sequencing      |
| 1252081               | CJM1_1289            | <i>pseA</i>      | putative flagellin modification protein, PseA                                     | -         | A       | Insertion    | coding       | frameshift                | Ter330fs                                                                                                             | Illumina sequencing      |
| 1252105               | CJM1_1289            | <i>pseA</i>      | putative flagellin modification protein, PseA                                     | -         | G       | Insertion    | coding       | frameshift                | Leu322fs                                                                                                             | Illumina sequencing      |
| 1261071               | CJM1_1295            | -                | flagellin B domain protein                                                        | -         | T       | Insertion    | coding       | frameshift, splice region | -                                                                                                                    | Sanger DNA sequencing    |
| 1261073               | CJM1_1295            | -                | flagellin B domain protein                                                        | -         | T       | Insertion    | coding       | frameshift                | Ter222fs                                                                                                             | Sanger DNA sequencing    |
| 1261080               | CJM1_1295            | -                | flagellin B domain protein                                                        | -         | T       | Insertion    | coding       | frameshift                | Arg220fs                                                                                                             | Sanger DNA sequencing    |
| 1271162               | CJM1_1304, CJM1_1305 | <i>cdsA/cdsA</i> | putative phosphatidate cytidyllyltransferase/cytidyllyltransferase family protein | -         | C       | Insertion    | coding       | frameshift, frameshift    | Met9fs/Val117fs                                                                                                      | Illumina sequencing      |
| 1300762               | CJM1_1333, CJM1_1334 | -, -             | Iron-sulfur cluster-binding domain protein/membrane protein                       | T         | G       | SNP          | coding       | mis-sense, synonymous     | Leu11Arg/Thr118Thr                                                                                                   | Illumina sequencing      |
| 1300765               | CJM1_1333, CJM1_1334 | -, -             | Iron-sulfur cluster-binding domain protein/membrane protein                       | T         | -       | Deletion     | coding       | frameshift, frameshift    | Phe120fs/Leu13fs                                                                                                     | Illumina sequencing      |
| 1341270               | CJM1_1376            | -                | putative nucleotidyl-sugar dehydratase                                            | -         | T       | Insertion    | coding       | frameshift                | Phe290fs                                                                                                             | Illumina sequencing      |
| 1514519               | CJM1_1546, CJM1_1547 | -, <i>pgpA</i>   | sulfate adenylyltransferase, putative, phosphatidylglycerophosphatase A           | -         | T       | Insertion    | intergenic   | -                         | -                                                                                                                    | Illumina sequencing      |
| 1544219               | CJM1_1585            | -                | PDZ domain family protein                                                         | A         | G       | SNP          | coding       | mis-sense                 | Arg136Gly                                                                                                            | Illumina sequencing      |
| 1577749               | CJM1_1627, CJM1_1628 | -, <i>bioB</i>   | Putative biotin synthase                                                          | T         | -       | Deletion     | coding       | frameshift, frameshift    | Lys2fs/Asn238fs                                                                                                      | Illumina sequencing      |
| 1613795               | CJM1_1679            | <i>flgE-2</i>    | putative flagellar hook protein FlgE                                              | T         | A       | SNP          | transcript   | stop lost, splice region  | Ter691Leu; termination codon at position 691 changed to a leucine with the extension not containing a new stop codon | Illumina sequencing      |

<sup>a</sup> position in *C. jejuni* M1 reference genome as published in Friis *et al.*, 2010 PLoS one 5, e1225<sup>b</sup> Based on Human Genome Variation Society (HGVS) notation (<http://www.hgvs.org/mutnomen/>); fs = frame shift

**Table S3** Overview of variants identified in M1 wild-type *ΔfliW* (CJM1cam\_1052) and *ΔfliW* (CJM1cam\_1052) clone A

| Position <sup>a</sup>                                     | Gene or intergenic region  | Gene                         | Description (C. jejuni M1cam annotation)                                                                                          | Reference | Variant | Variant type | Feature Type                  | Variant effect            | Predicted effect (protein level) <sup>b</sup> | Note                                                  |
|-----------------------------------------------------------|----------------------------|------------------------------|-----------------------------------------------------------------------------------------------------------------------------------|-----------|---------|--------------|-------------------------------|---------------------------|-----------------------------------------------|-------------------------------------------------------|
| <b>C. jejuni M1 wild-type <i>ΔfliW</i> (CJM1cam_1052)</b> |                            |                              |                                                                                                                                   |           |         |              |                               |                           |                                               |                                                       |
| 78447                                                     | CJM1cam_0061               | <i>fliY_2</i>                | Flagellar motor switch protein FliY, partial                                                                                      | -         | T       | Insertion    | coding                        | frameshift                | Lys138fs                                      | Unique to WT                                          |
| 87749                                                     | CJM1cam_0071, CJM1cam_0072 | CJM1cam_0071, CJM1cam_0072   | Glutathione synthase/Ribosomal protein S6 modification enzyme (glutaminyl transferase), non-heme iron protein, hemerythrin family | -         | T       | Insertion    | intergenic                    | -                         | -                                             | Also present in <i>fliW</i> mutant clone A            |
| 236030                                                    | CJM1cam_0238               | CJM1cam_0238                 | Exonuclease III                                                                                                                   | -         | T       | Insertion    | coding                        | frameshift                | Lys45fs                                       | Also present in <i>fliW</i> mutant clone A            |
| 275077                                                    | CJM1cam_0280               | <i>modB</i>                  | ABC-type sulfate/molybdate transport system, permease component                                                                   | A         | T       | SNP          | coding                        | missense                  | Leu197His                                     | Also present in <i>fliW</i> mutant clone A            |
| 279769                                                    | CJM1cam_0286               | <i>bioA_1</i>                | Adenosylmethionine-8-amino-7-oxononanoate aminotransferase                                                                        | -         | A       | Insertion    | coding                        | frameshift                | Ile138fs                                      | Also present in <i>fliW</i> mutant clone A            |
| 730937                                                    | CJM1cam_0753, CJM1cam_0754 | <i>uvrD, peb2</i>            | DNA helicase II, Major antigenic peptide Peb2                                                                                     | -         | A       | Insertion    | intergenic                    | -                         | -                                             | Also present in <i>fliW</i> mutant clone A            |
| 744771                                                    | CJM1cam_0769, CJM1cam_0770 | <i>flgS</i> , CJM1cam_0770   | Two-component system sensor histidine kinase FlgS, Hypothetical protein CJM1cam_0770                                              | C         | T       | SNP          | intergenic                    | -                         | -                                             | Also present in <i>fliW</i> mutant clone A            |
| 744795                                                    | CJM1cam_0769, CJM1cam_0770 | <i>flgS</i> , CJM1cam_0770   | Two-component system sensor histidine kinase FlgS, Hypothetical protein CJM1cam_0770                                              | -         | TT      | Insertion    | intergenic                    | -                         | -                                             | Also present in <i>fliW</i> mutant clone A            |
| 801201                                                    | CJM1cam_0826, CJM1cam_0827 | CJM1cam_0826, <i>folD</i>    | Hypothetical protein CJM1cam_0826, Bifunctional protein FolD                                                                      | -         | A       | Insertion    | intergenic                    | -                         | -                                             | Unique to WT                                          |
| 904409                                                    | CJM1cam_0934               | <i>mnmE</i>                  | tRNA modification GTPase MnmE                                                                                                     | A         | T       | SNP          | coding                        | missense                  | Leu212Ile                                     | Also present in <i>fliW</i> mutant clone A            |
| 917987                                                    | CJM1cam_0948               | CJM1cam_0948                 | Non-heme iron protein, hemerythrin family                                                                                         | C         | T       | SNP          | coding                        | synonymous                | Tyr55Tyr                                      | Also present in <i>fliW</i> mutant clone A            |
| 918173                                                    | CJM1cam_0948               | CJM1cam_0948                 | Non-heme iron protein, hemerythrin family                                                                                         | C         | T       | SNP          | coding                        | synonymous                | His117His                                     | Also present in <i>fliW</i> mutant clone A            |
| 976923                                                    | CJM1cam_1008               | CJM1cam_1008                 | DnaJ like protein, partial                                                                                                        | -         | T       | Insertion    | coding                        | frameshift, splice region | -                                             | Unique to WT                                          |
| 977445                                                    | CJM1cam_1009               | CJM1cam_1009                 | Hypothetical protein CJM1cam_1009                                                                                                 | -         | G       | Insertion    | coding                        | frameshift                | Leu95fs                                       | Also present in <i>fliW</i> mutant clone A            |
| 1087523                                                   | CJM1cam_1123               | CJM1cam_1123                 | Hypothetical protein CJM1cam_1123                                                                                                 | -         | T       | Insertion    | coding                        | frameshift                | Lys383fs                                      | Unique to WT                                          |
| 1263720                                                   | CJM1cam_1296, CJM1cam_1297 | <i>flaA</i> and <i>maf-5</i> | Flagellin A, Motility accessory factor Maf-5                                                                                      | -         | T, TT   | Insertion    | intergenic                    | -                         | -                                             | TT variant also present in <i>fliW</i> mutant clone A |
| 1445565                                                   | CJM1cam_1477               | <i>galU</i>                  | UTP-glucose-1-phosphate uridylyltransferase GalU                                                                                  | G         | A       | SNP          | coding                        | missense                  | Leu85Phe                                      | Unique to WT                                          |
| 1449230                                                   | CJM1cam_1480               | <i>cysW</i>                  | ABC-type tungstate transport system, periplasmic component                                                                        | A         | G       | SNP          | coding                        | missense                  | Val155Ala                                     | Also present in <i>fliW</i> mutant clone A            |
| 1459202                                                   | CJM1cam_1491               | CJM1cam_1491                 | Putative ATPase                                                                                                                   | A         | T,G     | SNP          | transcript, transcript coding | stop gained, missense     | Lysine 8 to a stop codon, Lys8Glu             | G variant also present in <i>fliW</i> mutant clone A  |
| 1540983                                                   | CJM1cam_1579               | <i>dnaG</i>                  | DNA primase DnaG                                                                                                                  | -         | A       | Insertion    | coding                        | frameshift                | Val482fs                                      |                                                       |
| <b>C. jejuni M1 <i>ΔfliW</i> (CJM1cam_1052) clone A</b>   |                            |                              |                                                                                                                                   |           |         |              |                               |                           |                                               |                                                       |
| 87749                                                     | CJM1cam_0071, CJM1cam_0072 | CJM1cam_0071, CJM1cam_0072   | Glutathione synthase/Ribosomal protein S6 modification enzyme (glutaminyl transferase), non-heme iron protein, hemerythrin family | -         | T       | Insertion    | intergenic                    | -                         | -                                             | Also present in coupled WT                            |
| 129257                                                    | CJM1cam_0120, CJM1cam_0121 | CJM1cam_0120, CJM1cam_0121   | Putative metalloprotease, hypothetical protein CJM1cam_0121                                                                       | -         | A       | Insertion    | intergenic                    | -                         | -                                             | Unique to <i>fliW</i> mutant clone A                  |
| 236030                                                    | CJM1cam_0238               | CJM1cam_0238                 | Exonuclease III                                                                                                                   | -         | T       | Insertion    | coding                        | frameshift                | Lys45fs                                       | Also present in coupled WT                            |
| 275077                                                    | CJM1cam_0280               | <i>modB</i>                  | ABC-type sulfate/molybdate transport system, permease component                                                                   | A         | T       | SNP          | coding                        | missense                  | Leu197His                                     | Also present in coupled WT                            |
| 279769                                                    | CJM1cam_0286               | <i>bioA_1</i>                | Adenosylmethionine-8-amino-7-oxononanoate aminotransferase                                                                        | -         | A       | Insertion    | coding                        | frameshift                | Ile138fs                                      | Also present in coupled WT                            |
| 730937                                                    | CJM1cam_0753, CJM1cam_0754 | <i>uvrD, peb2</i>            | DNA helicase II, Major antigenic peptide Peb2                                                                                     | -         | A       | Insertion    | intergenic                    | -                         | -                                             | Also present in coupled WT                            |
| 744771                                                    | CJM1cam_0769, CJM1cam_0770 | <i>flgS</i> , CJM1cam_0770   | Two-component system sensor histidine kinase FlgS, Hypothetical protein CJM1cam_0770                                              | C         | T       | SNP          | intergenic                    | -                         | -                                             | Also present in coupled WT                            |
| 744795                                                    | CJM1cam_0769, CJM1cam_0770 | <i>flgS</i> , CJM1cam_0770   | Two-component system sensor histidine kinase FlgS, Hypothetical protein CJM1cam_0770                                              | -         | TT      | Insertion    | intergenic                    | -                         | -                                             | Also present in coupled WT                            |
| 766440                                                    | CJM1cam_0791               | CJM1cam_0791                 | Hypothetical protein CJM1cam_0791                                                                                                 | G         | A       | SNP          | coding                        | synonymous                | Lys252Lys                                     | Unique to <i>fliW</i> mutant clone A                  |
| 904409                                                    | CJM1cam_0934               | <i>mnmE</i>                  | tRNA modification GTPase MnmE                                                                                                     | A         | T       | SNP          | coding                        | missense                  | Leu212Ile                                     | Also present in coupled WT                            |
| 917987                                                    | CJM1cam_0948               | CJM1cam_0948                 | Non-heme iron protein, hemerythrin family                                                                                         | C         | T       | SNP          | coding                        | synonymous                | Tyr55Tyr                                      | Also present in coupled WT                            |
| 918173                                                    | CJM1cam_0948               | CJM1cam_0948                 | Non-heme iron protein, hemerythrin family                                                                                         | C         | T       | SNP          | coding                        | synonymous                | His117His                                     | Also present in coupled WT                            |
| 977445                                                    | CJM1cam_1009               | CJM1cam_1009                 | Hypothetical protein CJM1cam_1009                                                                                                 | -         | G       | Insertion    | coding                        | frameshift                | Leu95fs                                       | Also present in coupled WT                            |
| 1263720                                                   | CJM1cam_1296, CJM1cam_1297 | <i>flaA, maf-5</i>           | Flagellin A, Motility accessory factor Maf-5                                                                                      | -         | T       | Insertion    | intergenic                    | -                         | -                                             | TT variant also present in coupled WT                 |
| 1449230                                                   | CJM1cam_1480               | <i>cysW</i>                  | ABC-type tungstate transport system, periplasmic component                                                                        | A         | G       | SNP          | coding                        | missense                  | Val155Ala                                     | Also present in coupled WT                            |
| 1459202                                                   | CJM1cam_1491               | CJM1cam_1491                 | Putative ATPase                                                                                                                   | A         | G       | SNP          | coding                        | missense                  | Lys8Glu                                       | G variant also present in coupled WT                  |

<sup>a</sup> position in C. jejuni CJM1cam reference genome (CP012149) submitted as part of this manuscript

<sup>b</sup> Based on Human Genome Variation Society (HGVS) notation (<http://www.hgvs.org/mutnomen/>); fs = frame shift

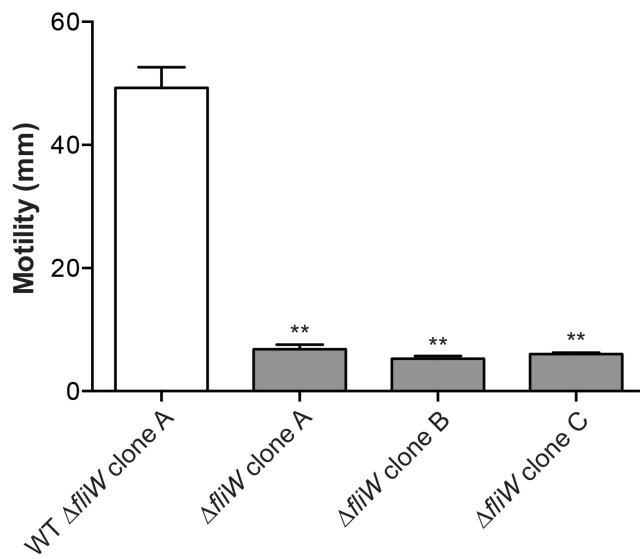

**Fig. S1.** Motility of *C. jejuni* M1 *fliW* defined gene deletion mutants. Motility of three *fliW* (CJM1\_1052) deletion mutant clones ( $n = 4$ ) along with their coupled wild-type strain ( $n = 2$ ) was assayed on BHI plates with 0.4% (w/v) agar after overnight incubation. All three *fliW* (CJM1\_1052) mutant clones were non-motile. Differential motility of *fliW* mutant clones was tested against the coupled wild-type (WT) strain with a Mann-Whitney test. Data shown are the mean and SEM, with \*\*  $P < 0.01$ .
